# Supplementary material for: Salvage Therapy for refractory or Relapsed ALL
Source: Springer Nature journal article supplement (doi:10.1186/1752-0509-6-149), 2003-01-01
Supplement: 12918_2011_1036_MOESM5_ESM.pdf [file 12918_2011_1036_MOESM5_ESM.pdf]

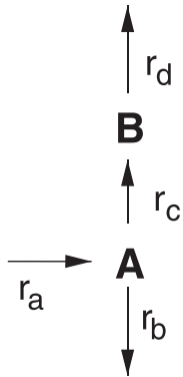

$$\begin{pmatrix} \dot{A} \\ \dot{B} \end{pmatrix} = N r = \begin{pmatrix} 1 & -1 & -1 & 0 \\ 0 & 0 & 1 & -1 \end{pmatrix} \begin{pmatrix} r_a \\ r_b \\ r_c \\ r_d \end{pmatrix}$$
