# Supplementary material for: Salvage Therapy for refractory or Relapsed ALL
Source: Springer Nature journal article supplement (doi:10.1186/1752-0509-6-149), 2003-01-01

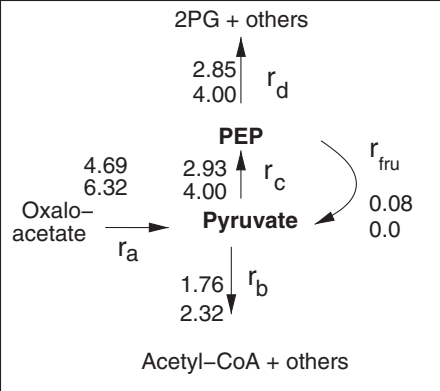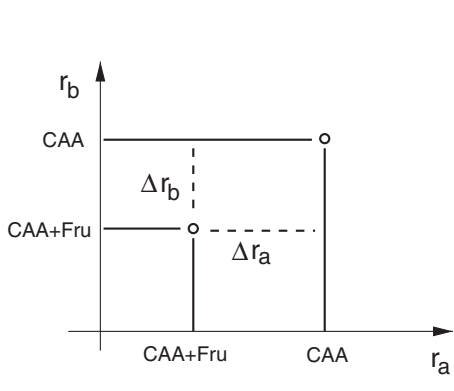

Supplement: 12918_2011_1036_MOESM10_ESM.pdf [file 12918_2011_1036_MOESM10_ESM.pdf]
